# Supplementary material
Source: HighWire-hosted journal article supplement (https://jnm.snmjournals.org/highwire/filestream/104756/field_highwire_adjunct_files/0/259747_Supplemental_Data.pdf)

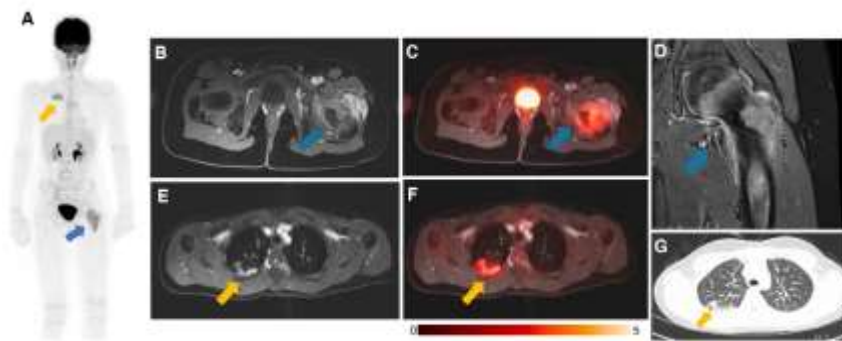

Supplemental Figure 1.

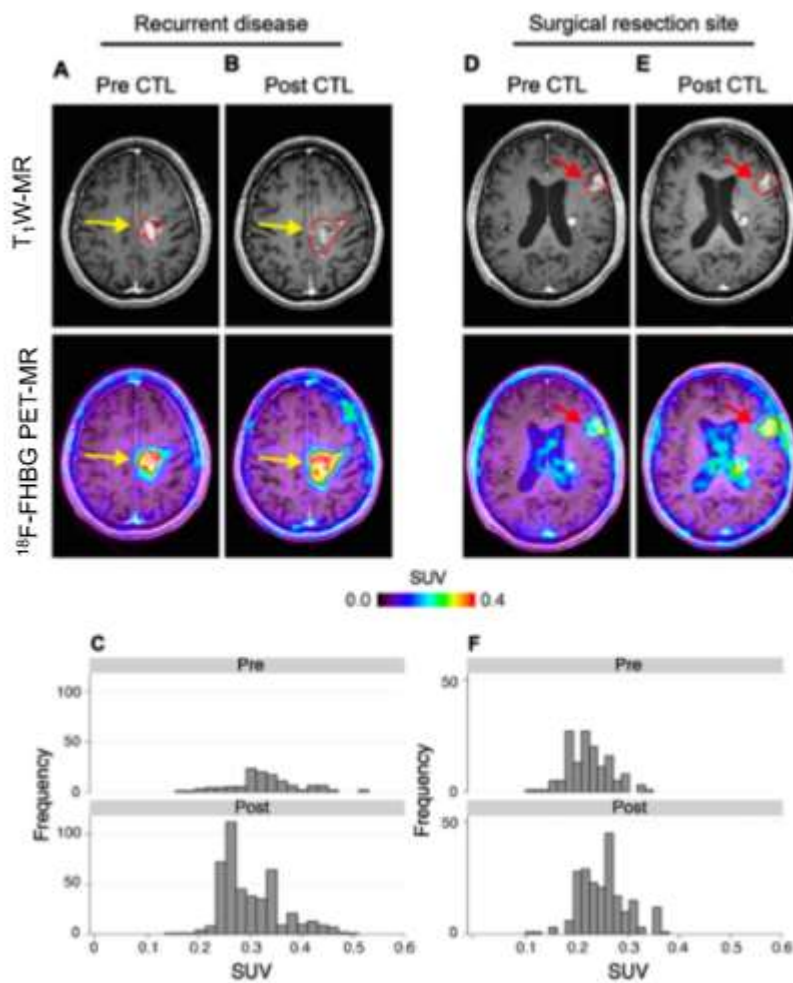

Supplemental Figure 2.

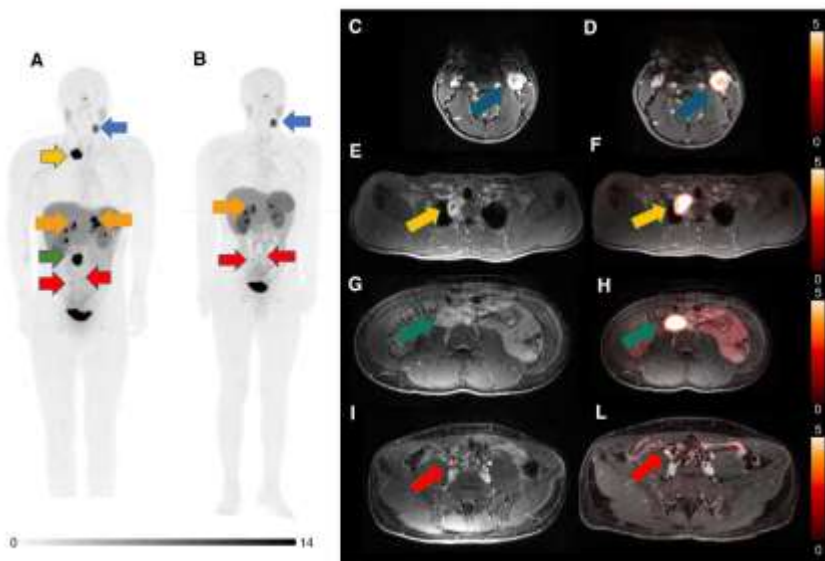

Supplemental Figure 3.

Supplement: 259747_Supplemental_Data.pdf [file 259747_Supplemental_Data.pdf]
